# Supplementary material for: Asymmetrical Sc coordination-induced bridging structure and surface relaxation for boosting H2O2 photoactivation in Fenton-like catalysis
Source: Royal Society of Chemistry journal article supplement (doi:10.1039/d4ta05800c), 2024-01-01
Supplement: d4ta05800c1.pdf [file d4ta05800c1.pdf]

**Supplementary Information**

Asymmetrical Sc coordination-induced bridging structure and surface  
relaxation for boosting H<sub>2</sub>O<sub>2</sub> photoactivation in Fenton-like catalysis

Cong Liu<sup>a,b</sup>, Mingchuan Yu<sup>a\*</sup>, Yuhao Ma<sup>a</sup>, Yuanzheng Zhang<sup>a,c</sup>, Yufei Zhou<sup>a</sup>, Junfeng Niu<sup>a</sup>

<sup>a</sup>*College of Environmental Science and Engineering, North China Electric Power University,  
Beijing 102206, China*

<sup>b</sup>*College of Water Conservancy and Hydropower Engineering, North China Electric Power  
University, Beijing 102206, China*

<sup>c</sup>*State Key Laboratory of Water Environment Simulation, School of Environment, Beijing  
Normal University, Beijing, China*

\* Corresponding author.

E-mail: [yumc@ncepu.edu.cn](mailto:yumc@ncepu.edu.cn)

Tel./fax: +86-10- 61773789

## 18 **Synthesis of g-C<sub>3</sub>N<sub>4</sub>**

19 1 g of melamine, 1 g of cyanuric acid and 0.1 g of uramil were added to a solution of  
20 ultrapure water and ethanol (volume ratio = 80:20), and stirred for 2 h. The resulting mixture  
21 was the dried and the solids were placed into a porcelain boat. A calcination process was  
22 carried out at 550°C for 2 h under nitrogen gas at a heating rate of 5°C/min.

## 23 **Synthesis of MoSe<sub>2</sub>**

24 Firstly, two separate solutions, solution A and solution B, were prepared. Solution A:  
25 sodium molybdate (Na<sub>2</sub>MoO<sub>4</sub>·2H<sub>2</sub>O, 2.42 g) was added to ultrapure water (50 mL); solution  
26 B: selenium (1.62 g) was added to ultrapure water (50 mL). Then, solution A was slowly  
27 added to solution B during stirring to form a mixture. The mixture was transferred into a  
28 PTFE reactor and subjected to a hydrothermal reaction at 200°C for 20 h. After cooling to  
29 room temperature, the powder was washed with ultrapure water and dried at 40°C in a  
30 vacuum oven.

31

32 **Tab. S1** Composition of CSM samples

|       | CN (g) | Sc precursor (g) | MoSe <sub>2</sub> (g) |
|-------|--------|------------------|-----------------------|
| CSM_1 | 0.2    | 0.01             | 0.01                  |
| CSM_2 | 0.2    | 0.01             | 0.02                  |
| CSM_3 | 0.2    | 0.01             | 0.03                  |
| CSM_4 | 0.2    | 0.005            | 0.02                  |
| CSM_5 | 0.2    | 0.02             | 0.02                  |

33

## 34 **Characterization**

35 Other characterizations were carried out by transmission electron microscopy (TEM,  
36 Tecnai G F20, FEI, USA), X-ray photoelectron spectroscopy (XPS, ESCALAB 250XI,

37 Thermo, USA) and X-ray diffraction spectroscopy (XRD, D8 Advance, Bruker, GER).  
38 Transient photocurrent responses and electrochemical impedance spectroscopy (EIS) and  
39 photocurrent response tests were conducted using an electrochemical workstation (CHI660E,  
40 CHI). A typical three-electrode system was utilized, where a platinum sheet (1 cm × 1 cm)  
41 and a saturated calomel electrode (SCE) were used as the counter and reference electrodes,  
42 respectively. The working electrodes were prepared by coating the samples inks on nickel  
43 foam substrates (1 cm × 1 cm). The ink mixture comprised of solid samples (0.25 g), Nafion  
44 solution (0.5 wt%, 10 µL) and ultrapure water (1.0 mL). During testing, a 300 W Xenon lamp  
45 (PLS-SXE300, Beijing Perfectlight) with an ultraviolet cut-off filter ( $\lambda > 420$  nm) was used as  
46 light source. The corresponding parameters in EIS test included a frequency range of 100 kHz  
47 to 10 mHz with an amplitude of 5 mV. Electron spin-resonance spectroscopy (ESR, JES  
48 FA200, JEOL, JPN) was performed to test the active species.

## 49 **Analysis procedures**

50 The concentration of tetrabromobisphenol A (TBBPA) was measured using ultra-high  
51 performance liquid chromatography (UPLC, ACQUITY H-class, Waters) with Xbridge BEH  
52 C18 column (2.1 mm × 50 mm, 1.7 µm). The wavelength of the PDA detector was set at 278  
53 nm, and the sample injection volume was 1.0 µL. The mobile phase was a mixture of HPLC-  
54 grade methanol and formic acid in ultrapure water (0.1%), which was delivered at 0.3 mL/min  
55 through the column. A gradient expressed as the ratio of methanol was as follows: 0-1.0 min,  
56 20%; 1.0-1.5 min, a linear increase from 20% to 50%; 1.5-3.0 min, hold at 50%; 3.0-3.5 min,  
57 a linear decrease to 20%, and hold at 20% to 5.0 min. The concentration of Br ions was  
58 measured by an ion chromatography (IC, ICS-5000+). The intermediates were analyzed using

59 an ultra-high performance liquid chromatography coupled with Orbitrap mass spectrometer  
60 (Dionex Ultimate 3000-Q Exactive FOCUS, Thermo Fisher) with the electrospray ionization  
61 (ESI) source under a negative mode. A full scan mode ( $m/z$  50 to 500) was used, and capillary  
62 voltage, cone voltages and desolvation temperature were 3.0 kV, 30 V, and 350°C,  
63 respectively. The products ion scan ( $MS^2$ ) was carried out and compound discoverer software  
64 was utilized for analysis.

## 65 **Theoretical procedure**

66 Density functional theory (DFT) calculations, including structural optimization, density  
67 of states (DOS), difference charge density and Gibbs free energy, were conducted using  
68 Vienna ab initio simulation package (VASP) and projector-augmented wave (PAW)  
69 methods.<sup>S1</sup> The correlation interactions were based on the generalized gradient approximation  
70 (GGA). The cut-off energy for the calculations was set to 450 eV,<sup>S2,S3</sup> and the force tolerance  
71 was set to 0.02 eV/Å. To avoid interaction between the two surfaces, a large vacuum gap of  
72 15 Å was selected in the periodically repeated slabs. The DOS and the difference charge  
73 density analyses were performed with a convergence condition of  $1.0 \times 10^{-6}$  eV/atom for total  
74 energy. The computational hydrogen electrode (CHE) model was used to obtain free energy  
75 change.

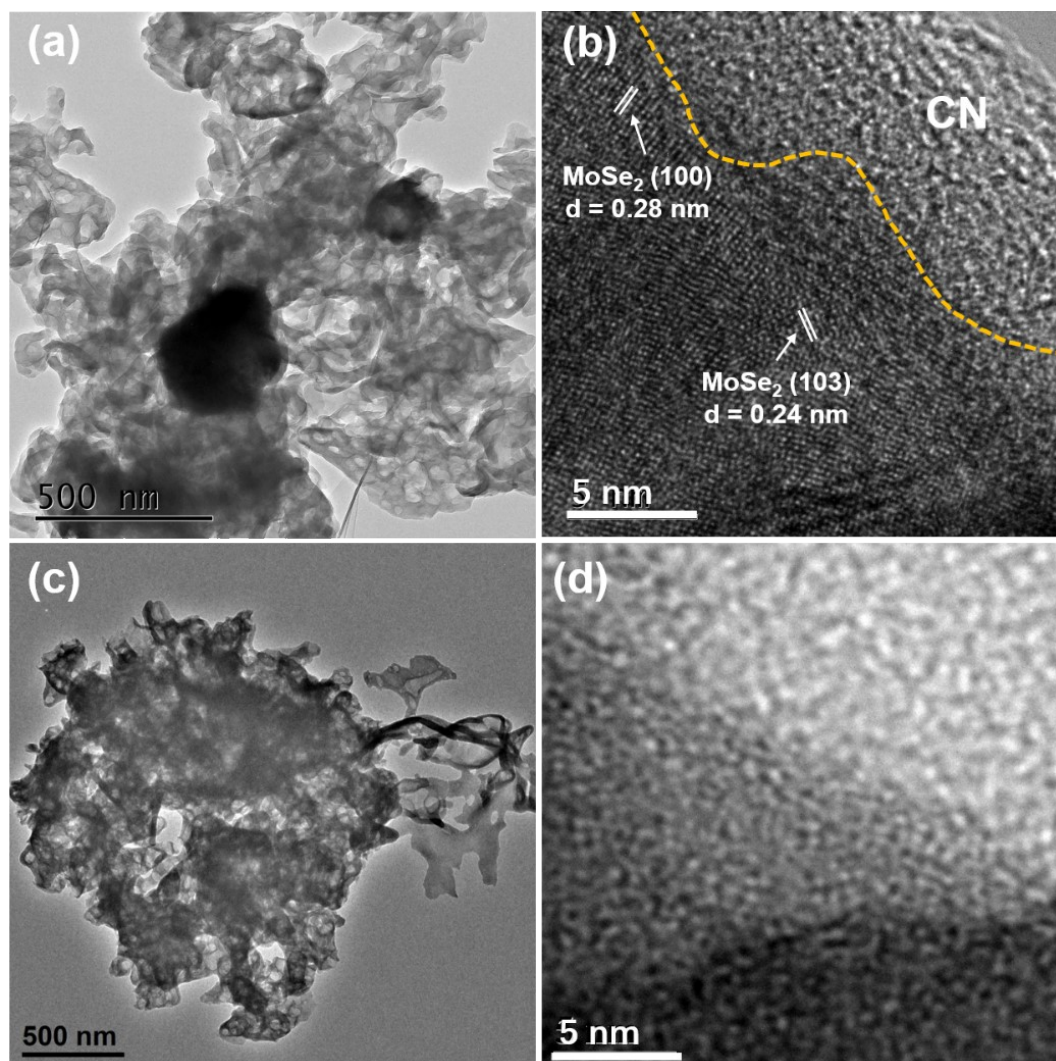

**Fig. S1** HRTEM images of (a-b) CSM\_2 and (c-d) CN.

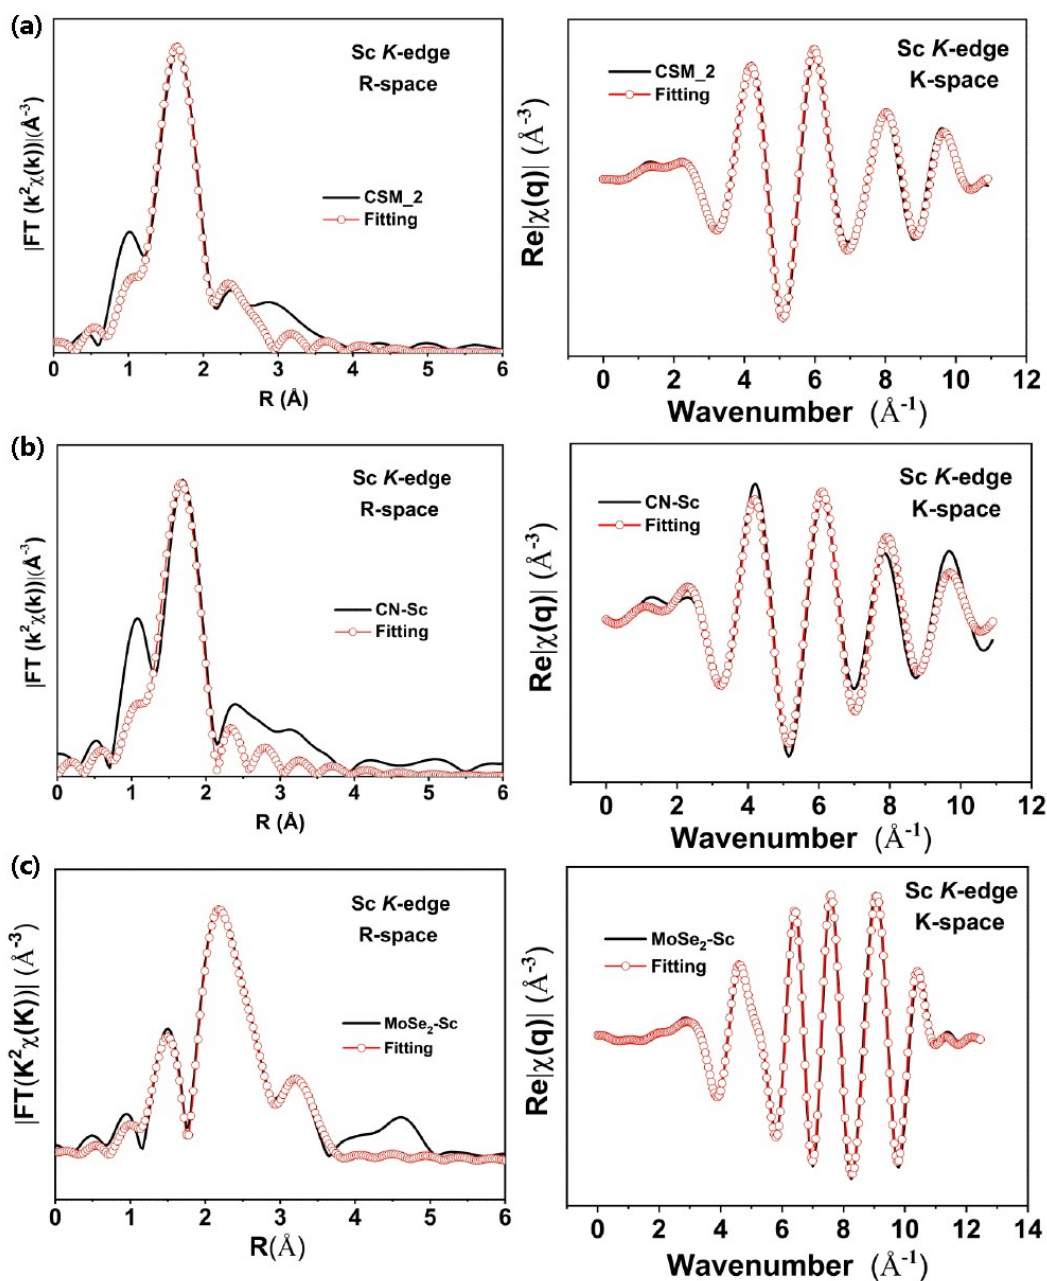

**Fig. S2** EXAFS fitting profiles of the (a) CSM\_2, (b) CN-Sc and (c) MoSe<sub>2</sub>-Sc at Sc K-edge.

**Tab. S2** Structural parameters of the samples obtained from EXAFS fitting.

| Sample | Bond type | N       | R (Å)     | $\Delta E_0$ (eV) | $\sigma^2 \times 10^3$ (Å <sup>2</sup> ) | R-factor |
|--------|-----------|---------|-----------|-------------------|------------------------------------------|----------|
| CSM_2  | Sc-N      | 4.0     | 2.12±0.01 | -4.9±3.6          | 6.6±3.2                                  | 0.008    |
|        | Sc-Se     | 1.3±0.5 | 2.73±0.01 | 13.6±11.1         | 17.3                                     |          |
| CN-Sc  | Sc-N      | 5.5±1.7 | 2.13±0.03 | -1.0±3.8          | 6.2±5.1                                  | 0.036    |

N, coordination number;

R, distance between absorber and backscatter atoms;

85  $\Delta E_0$ , inner potential correction to account for the difference in the inner potential between the sample and  
86 the reference compound.  
87  $\sigma^2$ , Debye–Waller factor.

88

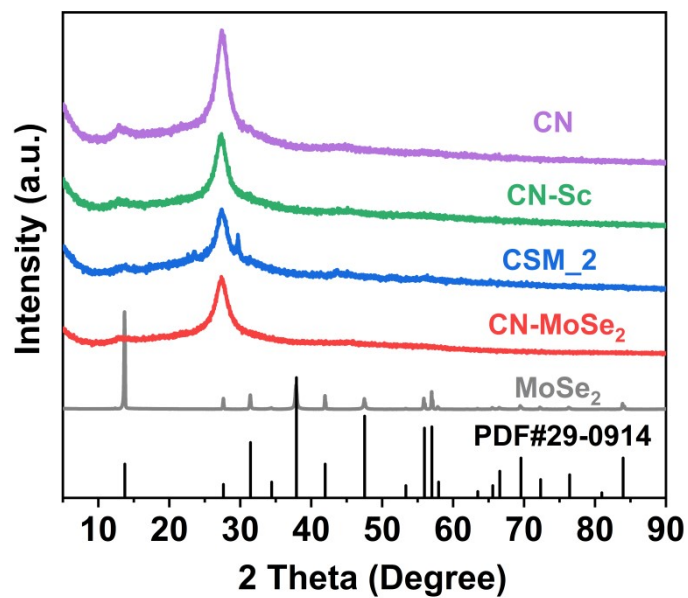

89

90

**Fig. S3** XRD patterns of the samples.

91



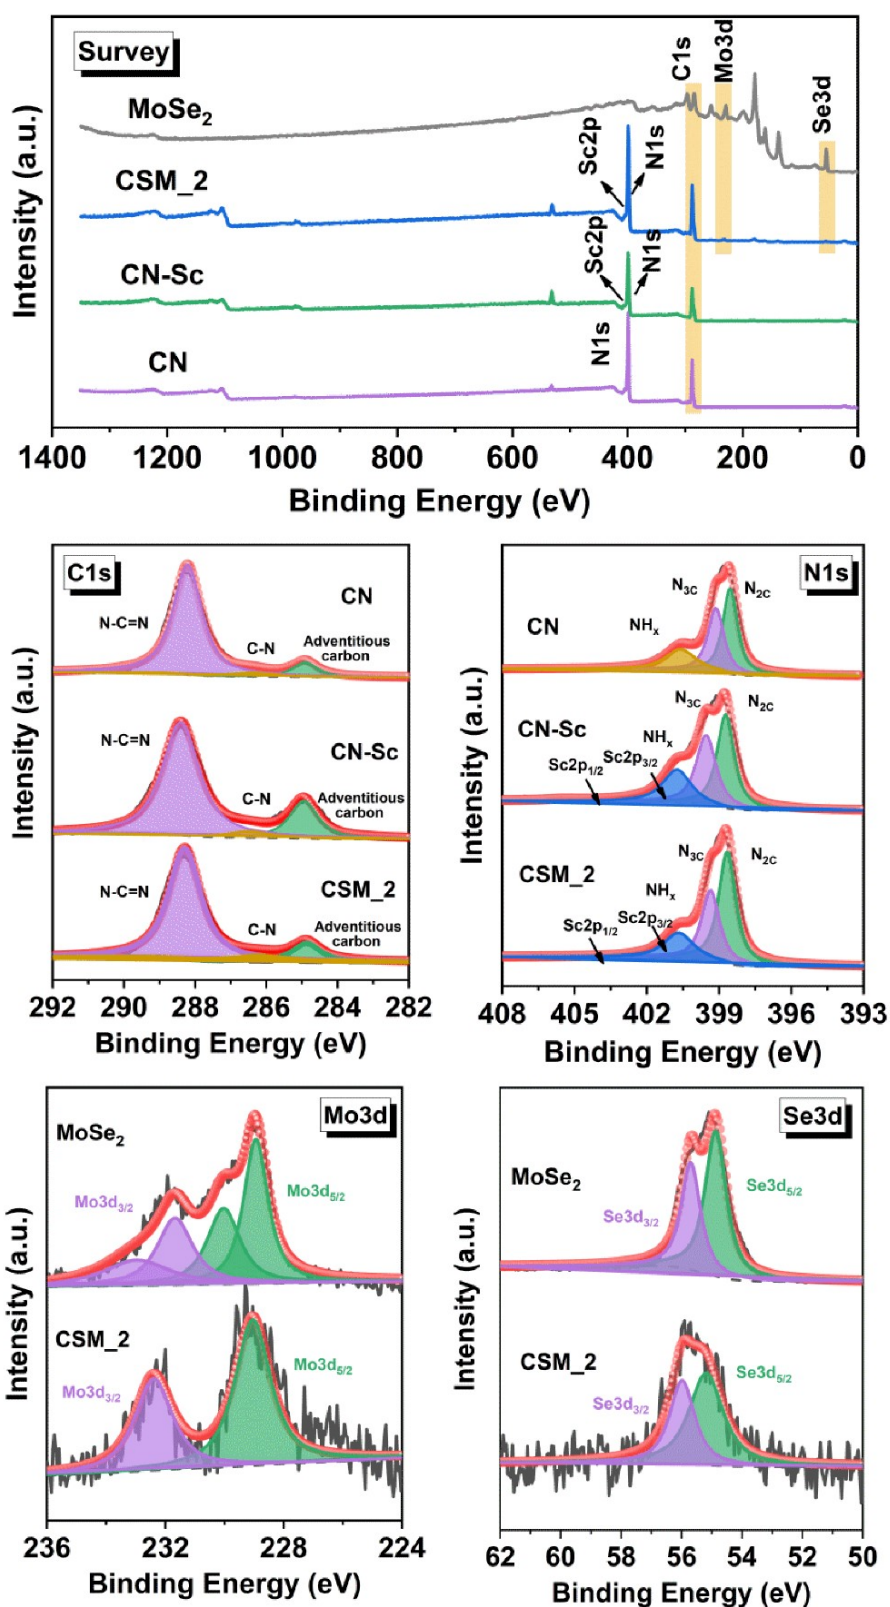

**Fig. S4** Survey, C1s, N1s, Mo3d and Se3d XPS spectra of the samples.

In C1s XPS spectra, the CN-based samples exhibit traditional peaks associated with



adventitious carbon (284.8 eV), C–N (286.2 eV) and N–C=N (288.2 eV). In N1s XPS spectra, both CN-Sc and CSM\_2 samples show peaks corresponding to Sc2p, with the exception of peaks attributed to bi-coordinated nitrogen ( $N_{2C}$ , 398.6 eV), tri-coordinated nitrogen ( $N_{3C}$ , 399.5 eV) and  $NH_x$  groups (400.7 eV).<sup>S4-S6</sup> The peaks of Sc2p<sub>3/2</sub> (400.4 eV) and Sc2p<sub>1/2</sub> (404.8 eV) are indiscernible due to the low Sc amount and overlapped with nitrogen.<sup>S7</sup> For Mo3d and Se3d XPS spectra, both MoSe<sub>2</sub> and CSM\_2 exhibit similar peaks corresponding to Mo3d<sub>5/2</sub>, Mo3d<sub>3/2</sub> and Se3d<sub>5/2</sub>, Se3d<sub>3/2</sub>, respectively.

**Tab. S3** Fitting parameters from TRPL spectra.

| ns [%]               | $\tau_1$ [ $A_1$ ] | $\tau_2$ [ $A_2$ ] | $\tau_3$ [ $A_3$ ] | $\tau_{avg}$ |
|----------------------|--------------------|--------------------|--------------------|--------------|
| CN                   | 3.44 [30.84]       | 1.15 [67.51]       | 16.27 [1.66]       | 4.24         |
| CN-Sc                | 0.60 [46.82]       | 10.00 [3.63]       | 2.25 [49.55]       | 3.59         |
| CN-MoSe <sub>2</sub> | 2.79 [34.02]       | 0.91 [64.29]       | 13.70 [1.69]       | 3.60         |
| CSM_2                | 2.66 [37.84]       | 12.5 [1.99]        | 0.82 [60.17]       | 3.54         |

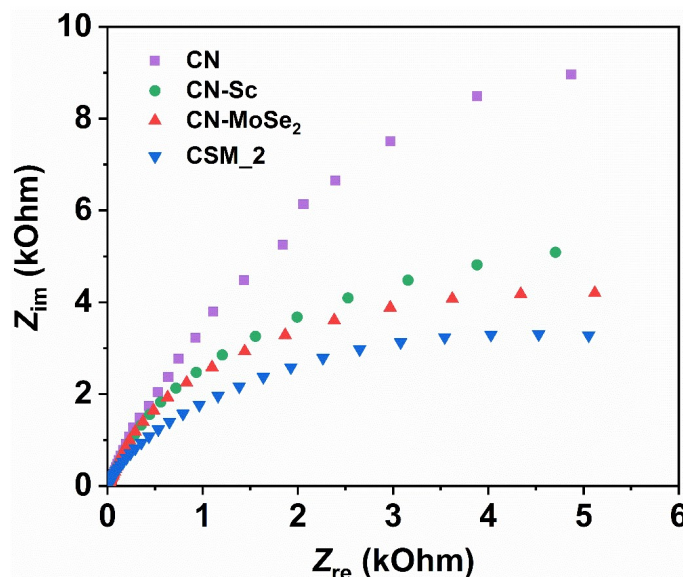

**Fig. S5** EIS spectra of the samples.

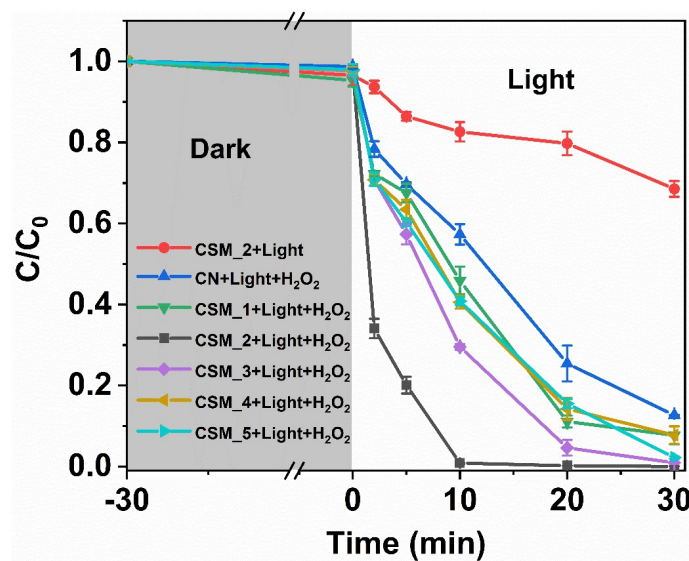

**Fig. S6** Plots of  $C/C_0$  versus time of the CSM\_2+Light, CN+Light+H<sub>2</sub>O<sub>2</sub>, CSM\_1+Light+H<sub>2</sub>O<sub>2</sub>, CSM\_2+Light+H<sub>2</sub>O<sub>2</sub>, CSM\_3+Light+H<sub>2</sub>O<sub>2</sub>, CSM\_4+Light+H<sub>2</sub>O<sub>2</sub> and CSM\_5+Light+H<sub>2</sub>O<sub>2</sub>.

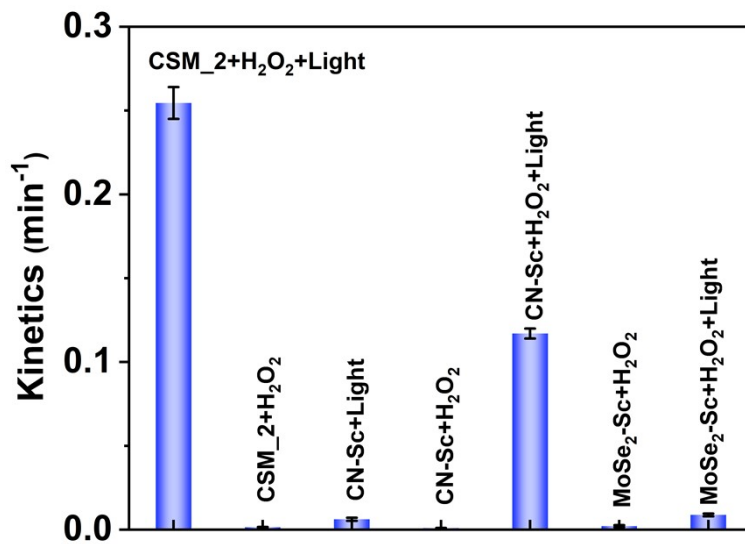

**Fig. S7** Apparent rate constant of the CSM\_2+H<sub>2</sub>O<sub>2</sub>, CN-Sc+Light, CN-Sc+H<sub>2</sub>O<sub>2</sub>, CN-Sc+Light+H<sub>2</sub>O<sub>2</sub>, MoSe<sub>2</sub>-Sc+H<sub>2</sub>O<sub>2</sub>, MoSe<sub>2</sub>-Sc+H<sub>2</sub>O<sub>2</sub>+Light.

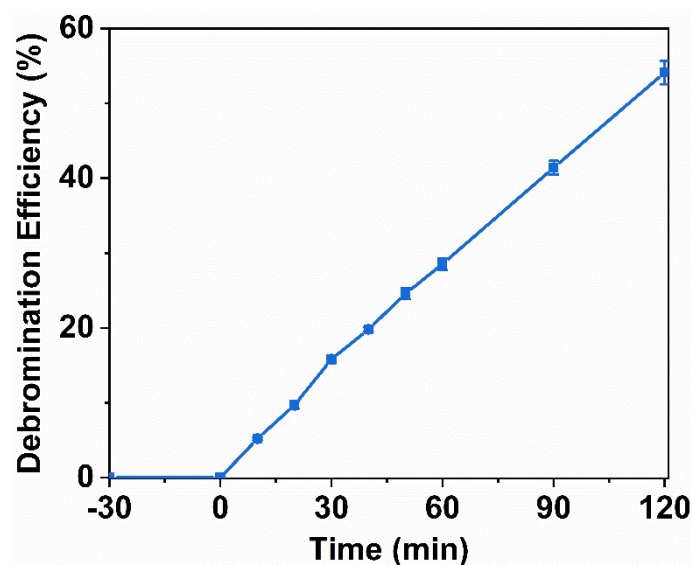

**Fig. S8** Debromination efficiency of the CSM\_2-induced photo-Fenton system.

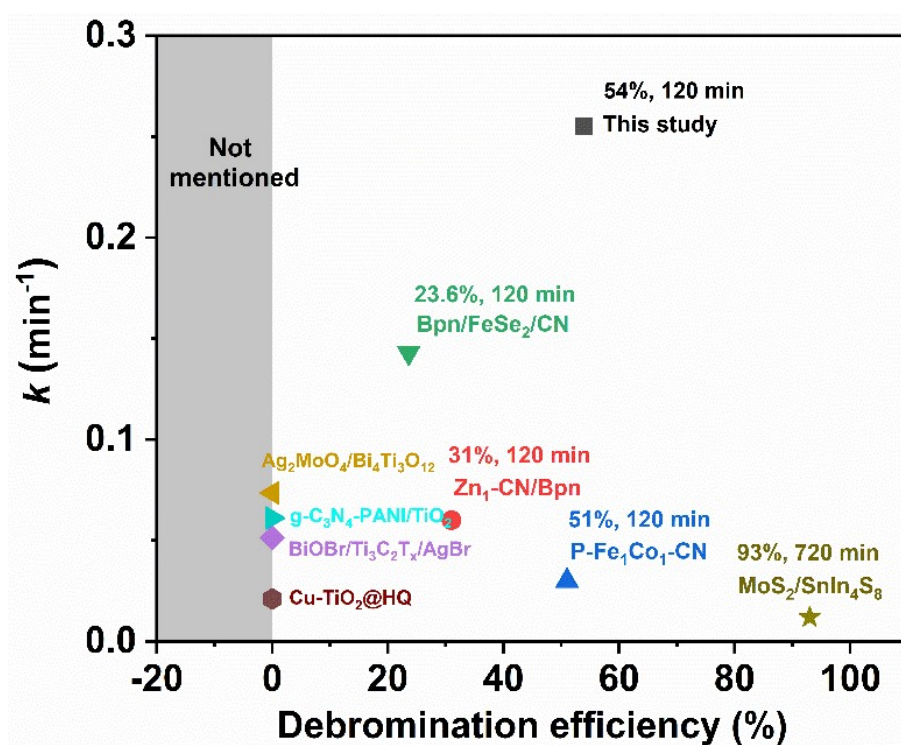

**Fig. S9** Photocatalytic performance of TBBPA degradation over Zn single-atom anchored g-C<sub>3</sub>N<sub>4</sub>/ black phosphorus nanosheets (Zn<sub>1</sub>-CN/Bpn)<sup>S8</sup>, P-induced Fe and Co single-atoms anchored g-C<sub>3</sub>N<sub>4</sub> (P-Fe<sub>1</sub>Co<sub>1</sub>/CN)<sup>S9</sup>, black phosphorus nanosheets/FeSe<sub>2</sub>/g-C<sub>3</sub>N<sub>4</sub> (Bpn/FeSe<sub>2</sub>/CN)<sup>S10</sup>, BiOBr/Ti<sub>3</sub>C<sub>2</sub>T<sub>x</sub>/AgBr<sup>S11</sup>, Ag<sub>2</sub>MoO<sub>4</sub>/Bi<sub>4</sub>Ti<sub>3</sub>O<sub>12</sub><sup>S12</sup>, Cu-TiO<sub>2</sub>@8-

Hydroxyquinoline (Cu-TiO<sub>2</sub>@HQ)<sup>S13</sup>, g-C<sub>3</sub>N<sub>4</sub>-PANI/TiO<sub>2</sub><sup>S14</sup>, MoS<sub>2</sub>/SnIn<sub>4</sub>S<sub>8</sub><sup>S15</sup>.

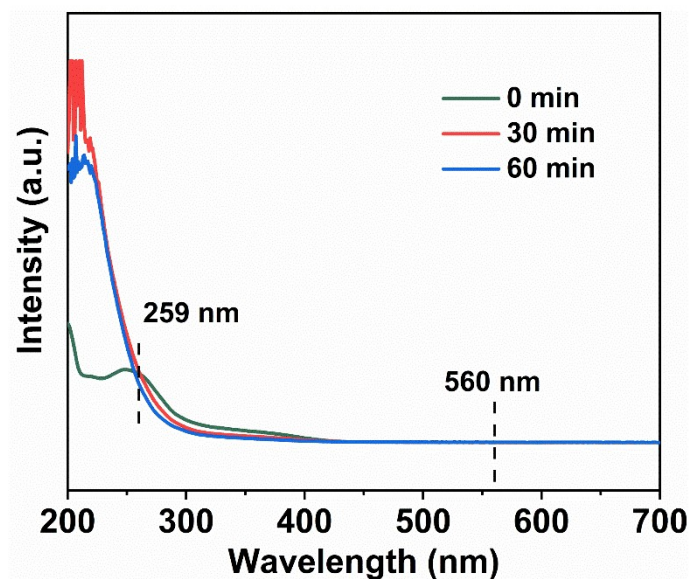

**Fig. S10** Time-dependent UV-vis absorption spectra of NBT solution in CSM<sub>2</sub>+Light+H<sub>2</sub>O<sub>2</sub> system, [NBT] = 0.1 mM.

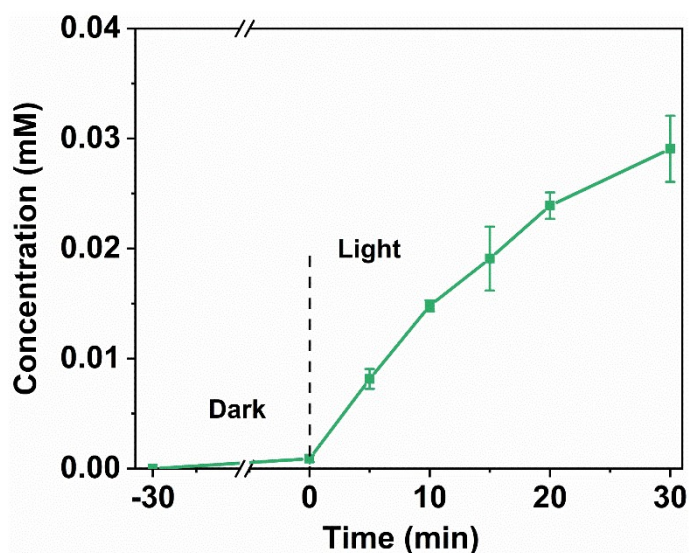

**Fig. S11** •OH production in the CSM<sub>2</sub>-induced photo-Fenton-like system by a salicylic acid method.

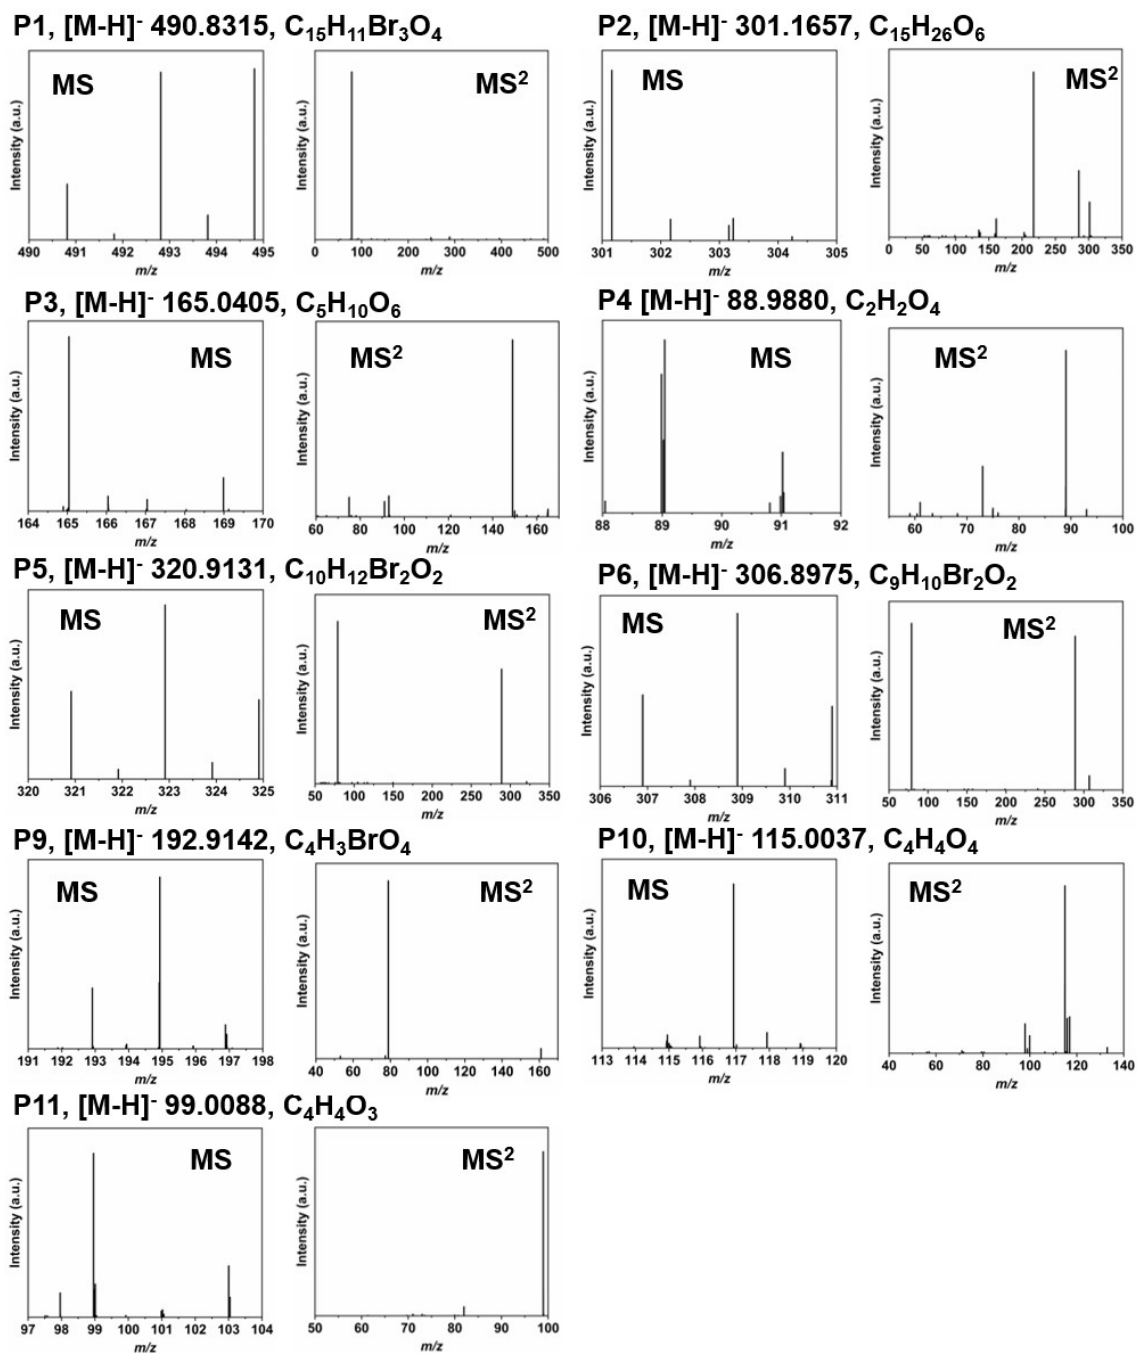

**Fig. S12** MS and MS<sup>2</sup> spectra of the intermediate products in CSM<sub>2</sub>-induced photo-Fenton-like system.

**P2, [M-H]<sup>-</sup> 301.1657, C<sub>15</sub>H<sub>26</sub>O<sub>6</sub>**

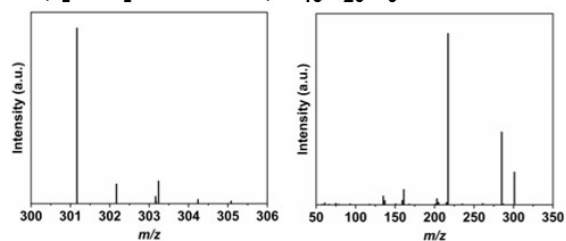

**P4 [M-H]<sup>-</sup> 88.9880, C<sub>2</sub>H<sub>2</sub>O<sub>4</sub>**

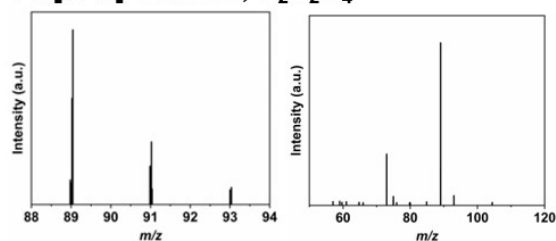

**P5, [M-H]<sup>-</sup> 320.9131, C<sub>10</sub>H<sub>12</sub>Br<sub>2</sub>O<sub>2</sub>**

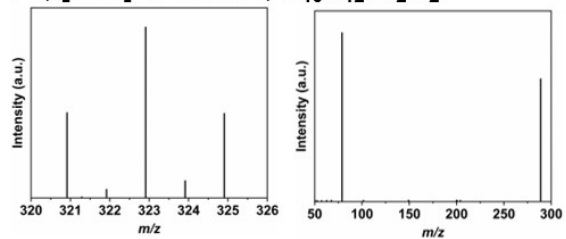

**P6, [M-H]<sup>-</sup> 306.8975, C<sub>9</sub>H<sub>10</sub>Br<sub>2</sub>O<sub>2</sub>**

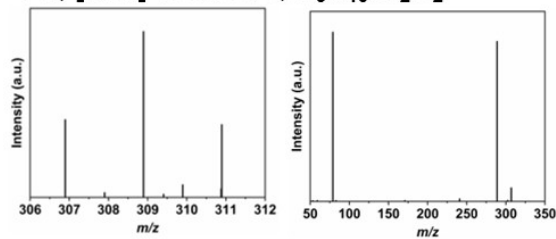

**P7, [M-H]<sup>-</sup> 278.8298, C<sub>6</sub>H<sub>2</sub>Br<sub>2</sub>O<sub>3</sub>**

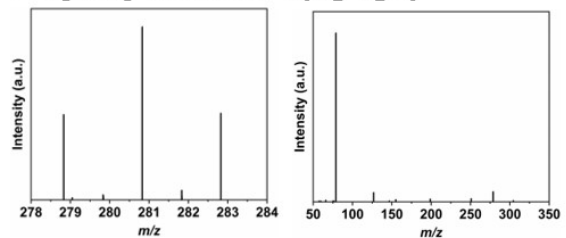

**P8, [M-H]<sup>-</sup> 200.9193, C<sub>6</sub>H<sub>3</sub>BrO<sub>3</sub>**

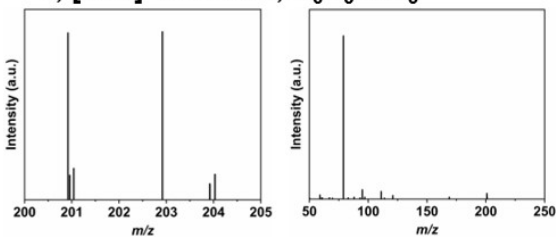

**P12, [M-H]<sup>-</sup> 133.0143, C<sub>4</sub>H<sub>6</sub>O<sub>5</sub>**

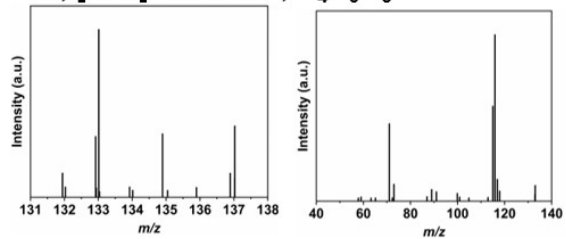

**Fig. S13** MS and MS<sup>2</sup> spectra of the intermediate products in CSM<sub>2</sub>-induced pure photocatalytic system.



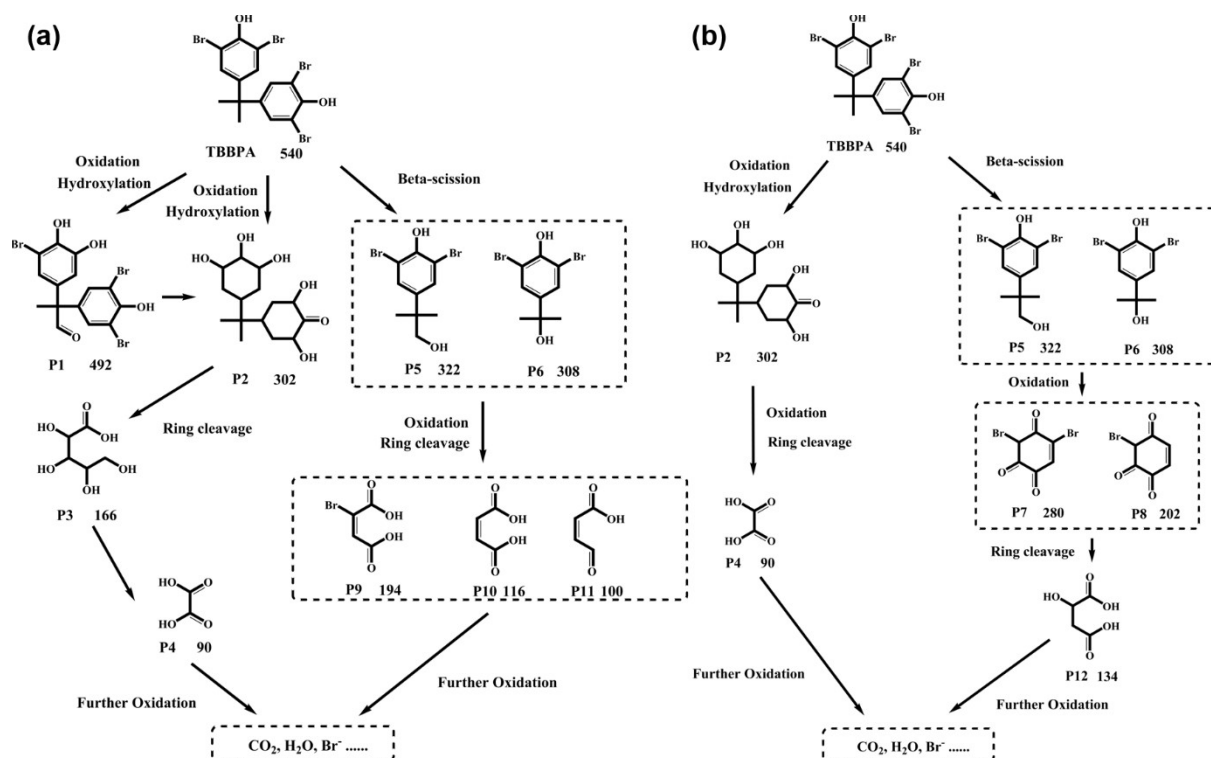

**Fig. S14** Proposed degradation routes in the CSM<sub>2</sub>-induced (a) photo-Fenton-like system and (b) pure photocatalytic system.

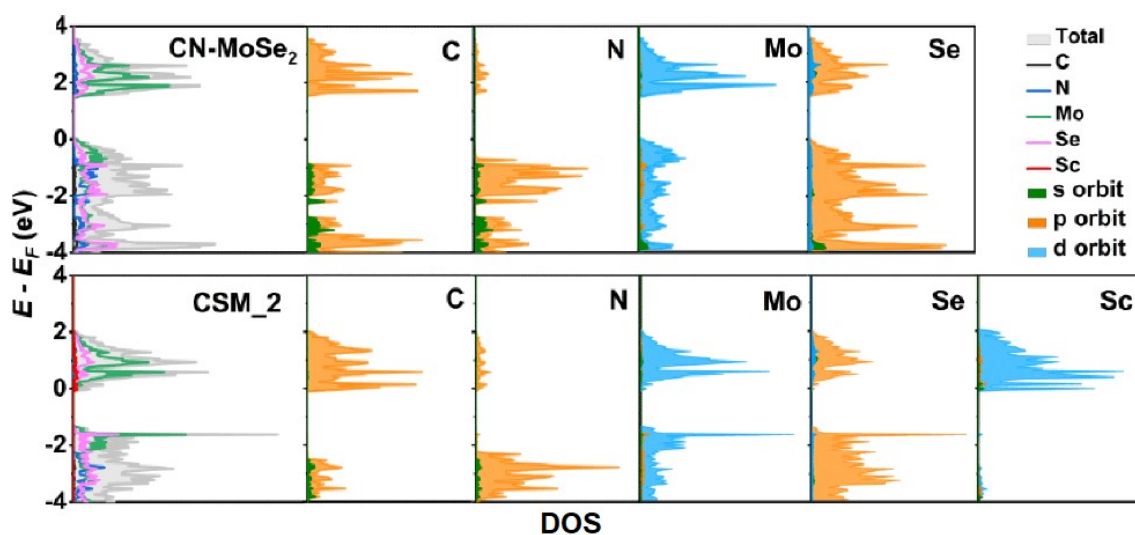

**Fig. S15** DOS profiles of the CN-MoSe<sub>2</sub> and CSM<sub>2</sub>.



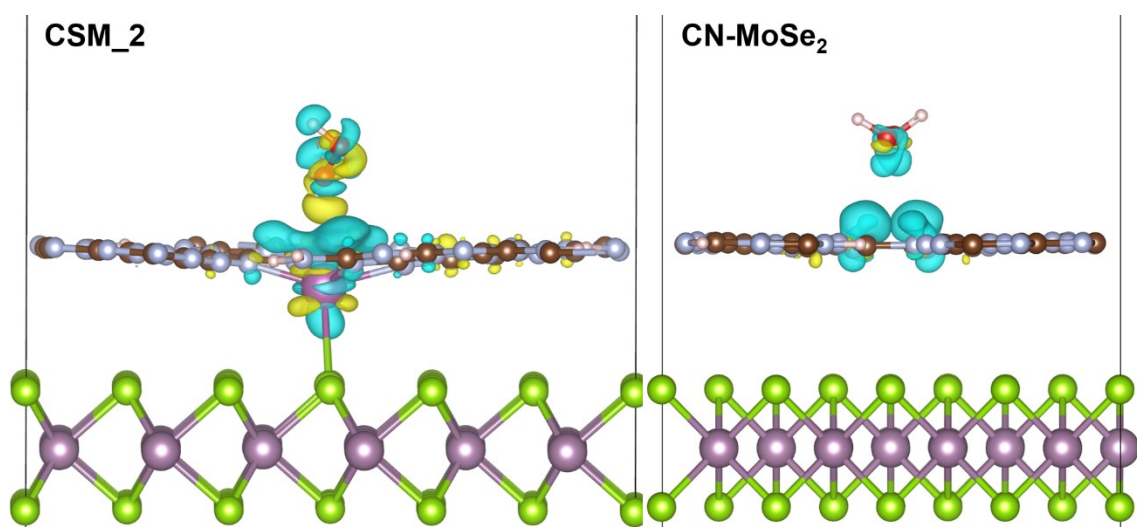

**Fig. S16** Difference charge density profiles of the adsorbed  $\text{H}_2\text{O}_2$  on the (a) CSM\_2 and (b) CN-MoSe<sub>2</sub>, yellow and cyan represent accumulation and depletion charge areas, respectively.

**Tab. S4** Bader charge transfer ( $\Delta q$ ) in CSM\_2.

| Atom | $\Delta q$ |
|------|------------|
| 1O   | 0.023353   |
| 2O   | 0.006041   |
| 3H   | -0.004545  |
| 4H   | -0.00758   |
| 5N   | -0.105924  |
| 6N   | -0.080391  |
| 7N   | 0.002475   |
| 8N   | -0.100209  |
| 9Sc  | -0.037826  |
| 10Se | -0.010151  |

## References in Supplementary Information

S1 G. Kresse, J. Furthmuller, *Comp. Mater. Sci.*, 1996, **6**, 15-50.

S2 G. Kresse, J. Furthmuller, *Phys. Rev. B*, 1996, **54**, 11169-11186.

S3 J. Zhou, G. Chen, K. Wu, Y. Cheng, *J. Phys. Chem. C*, 2013, **117**, 12991-12999.

S4 D. Zhao, C. Dong, B. Wang, C. Chen, Y. Huang, Z. Diao, S. Li, L. Guo, S. Shen, *Adv.*

- 162 *Mater.*, 2019, **31**, 1903545.
- 163 S5 H. Yu, R. Shi, Y. Zhao, T. Bian, Y. Zhao, C. Zhou, G. I. N. Waterhouse, L. Wu, C. Tung,  
 164 T. Zhang, *Adv. Mater.*, 2017, **29**, 1605148.
- 165 S6 G. Peng, L. Xing, J. Barrio, M. Volokh, M. Shalom, *Angew. Chem. Int. Ed.*, 2018, **57**,  
 166 1186-1192.
- 167 S7 X. Wen, Z. Duan, L. Bai, J. Guan, *J. Power Sources*, 2019, **431**, 265-273.
- 168 S8 C. Liu, M. Yu, H. Liang, Y. Zhou, R. Zhan, Y. Sun, D. Li, C. Liu, J. Niu, *Sep. Purif.*  
 169 *Technol.*, 2022, **285**, 120404.
- 170 S9 M. Yu, C. Liu, X. Sun, J. Lu, J. Niu, *ACS Appl. Mater. Interfaces*, 2022, **14**, 5376-5383.
- 171 S10 C. Liu, S. Sun, M. Yu, Y. Zhou, X. Zhang, J. Niu, *Sep. Purif. Technol.*, 2023, **311**,  
 172 123359.
- 173 S11 S. Huang, Y. Wang, J. Wan, Z. Yan, Y. Ma, G. Zhang, S. Wang, *Appl. Catal. B-Environ.*,  
 174 2022, **319**, 121913.
- 175 S12 T. Cheng, H. Gao, X. Sun, T. Xian, S. Wang, Z. Yi, G. Liu, X. Wang, H. Yang, *Adv.*  
 176 *Powder Technol.*, 2021, **32**, 951-962.
- 177 S13 X. Zhang, Y. Chen, Q. Shang, Y. Guo, *Sci. Total Environ.*, 2020, **716**, 137144.
- 178 S14 Q. Zhou, D. Zhao, Y. Sun, X. Sheng, J. Zhao, J. Guo, B. Zhou, *Chemosphere*, 2020, **252**,  
 179 126468.
- 180 S15 R. Weng, F. Tian, Z. Yu, J. Ma, Y. Lv, B. Xi, *Chemosphere*, 2021, **285**, 131542.
